# Supplementary material for: Serine-linked PARP1 auto-modification controls PARP inhibitor response
Source: PubMed Central journal article supplement (PMC8249464; doi:10.1038/s41467-021-24361-9), 2021-07-01
Supplement: 41467_2021_24361_MOESM1_ESM.pdf [file 41467_2021_24361_MOESM1_ESM.pdf]

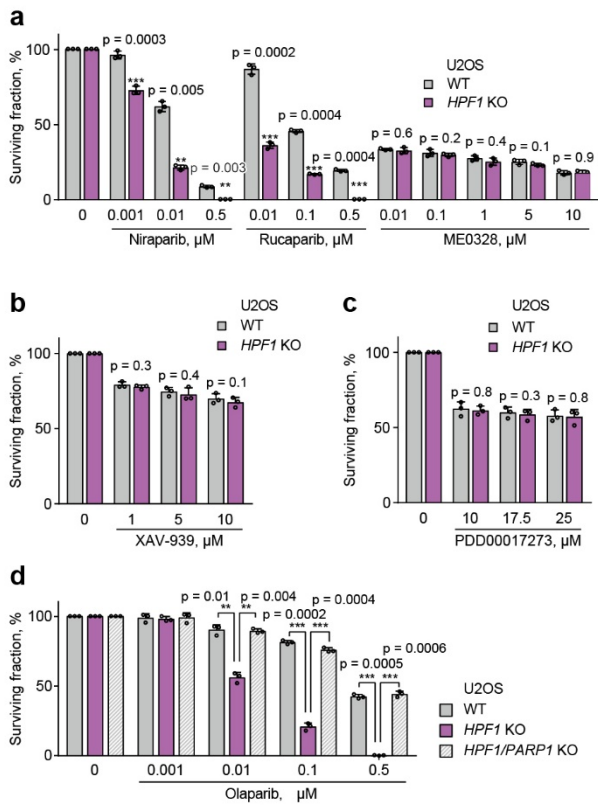

**Supplementary Figure 1: Loss of HPF1 specifically sensitises cells to PARP1 or PARP2 inhibitors but not to inhibitors of other factors involved in the regulation of cellular ADPr levels (related to Fig. 1a).**

**a**, Increased sensitivity of HPF1 KO cells to Olaparib treatment is abolished upon concurrent PARP1 KO. Significance of the difference between HPF1 KO and WT and HPF1/PARP1 KO and HPF1 KO is indicated. **b-d**, Reduced survival of HPF1 KO cells after treatment with PARP1/2 inhibitors Niraparib and Rucaparib but not with PARP3 inhibitor ME0328 (**b**), PARP5a/b inhibitor XAV-939 (**c**), or PARG inhibitor PDD00017273 (**d**). **a-d**, All data are shown as mean  $\pm$  SD of three independent experiments. \*,  $p < 0.05$ ; \*\*,  $p < 0.01$ ; \*\*\*,  $p < 0.001$  (two-tailed Student's t-test).

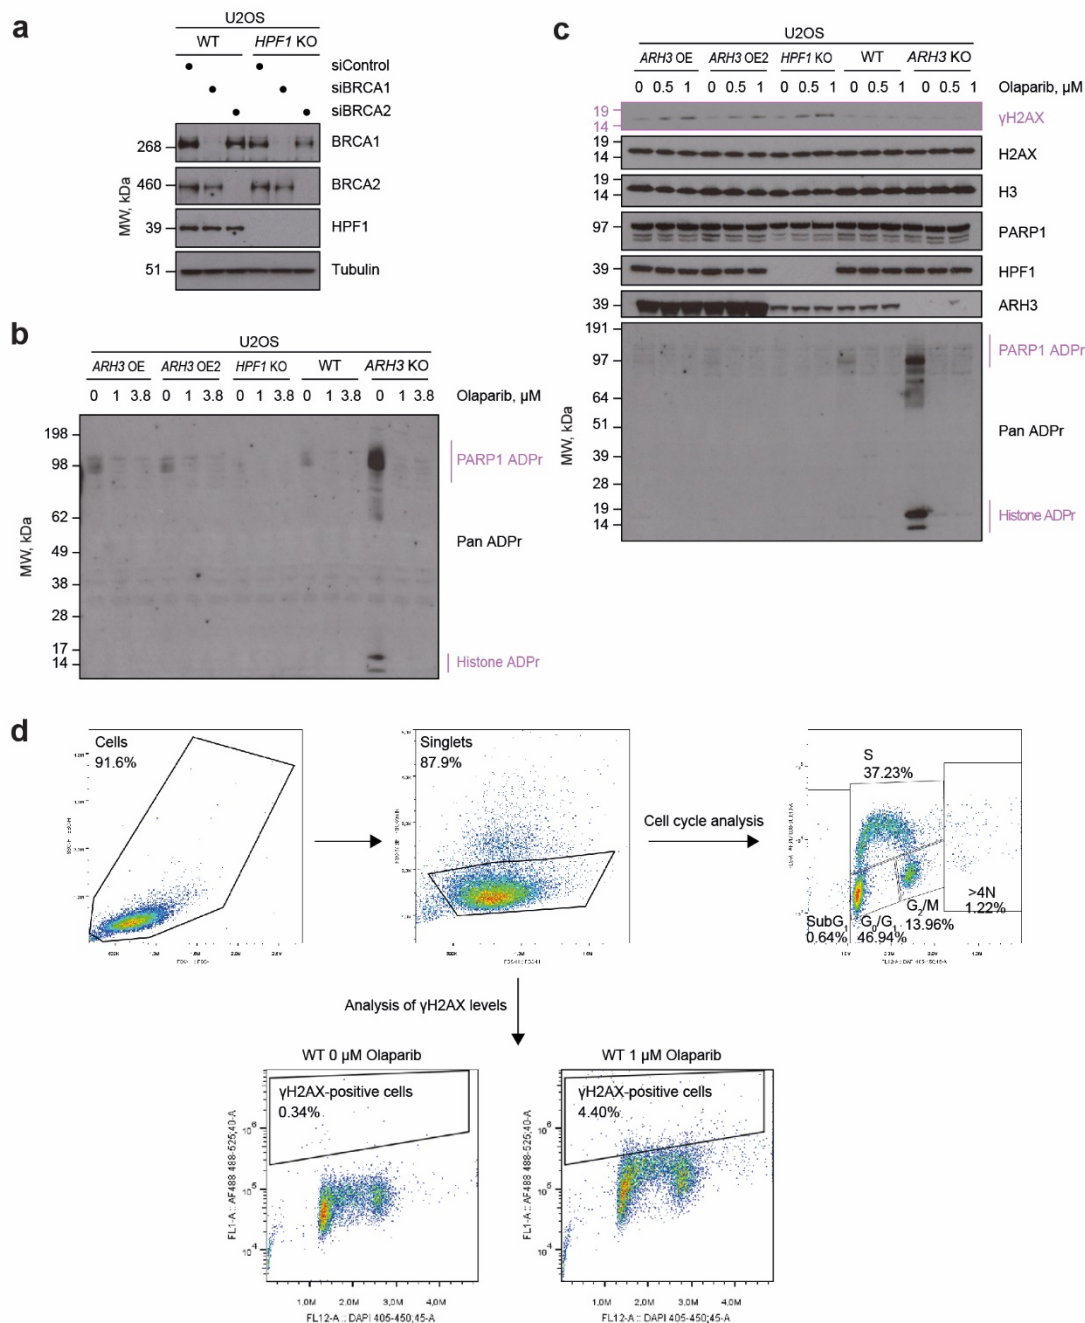

**Supplementary Figure 2: HPF1 and ARH3 status affects cell ADPr levels, Olaparib-induced  $\gamma$ H2AX formation and changes in cell cycle distribution (related to Fig. 1b-e).**

**a**, siRNAs against *BRCA1* and *BRCA2* specifically downregulate these genes in U2OS WT and HPF1 KO cells. These are control immunoblots to accompany **Fig. 1b**. **b**, Pan ADPr immunoblot for the experiment in **Fig. 1c**. **c**, A repeat of the experiment in **Fig. 1c** performed with lower Olaparib concentration used for a 6-day treatment. Olaparib-induced  $\gamma$ H2AX formation depends on cellular HPF1 and ARH3 protein levels. **d**, Flow cytometry gating strategy for analysis of cell cycle distribution in **Fig. 1d** and **e** and  $\gamma$ H2AX levels in **Fig. 1e**. The experiments in **a-c** were repeated independently at least two times with similar results.

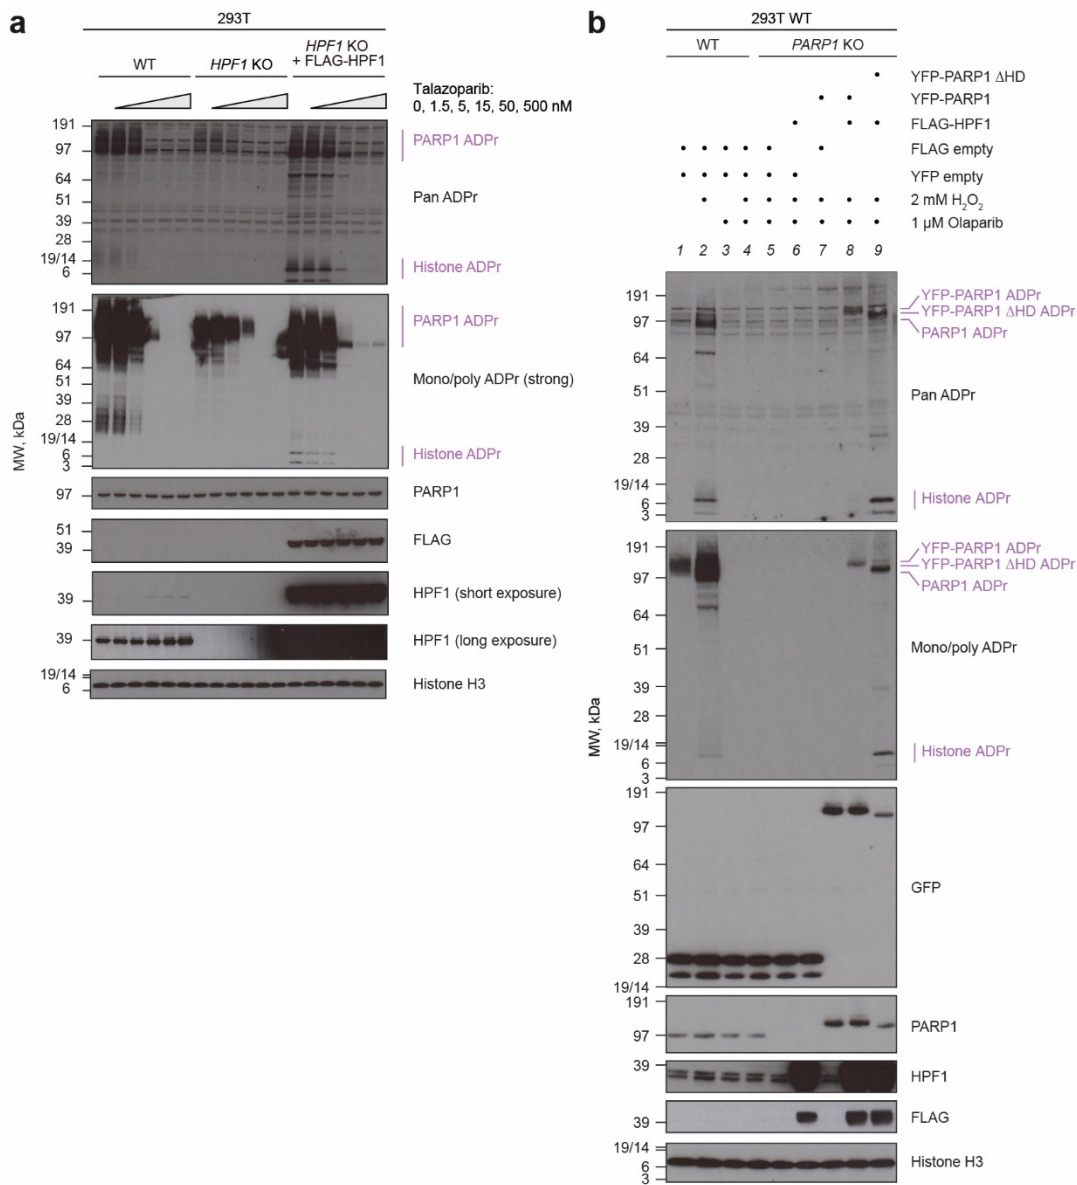

**Supplementary Figure 3: Persistence of HPF1-dependent ADP-ribosylation signal at elevated PARP1/PARP2 inhibitor concentrations (related to Fig. 2a, c).**

**a**, Cellular ADPr levels detected throughout increasing molarities of Talazoparib depend on HPF1 status. The effects of 12-h Talazoparib treatment on cells with endogenous HPF1 levels, loss or overexpression of HPF1 are compared. **b**, Simultaneous DNA damage (H<sub>2</sub>O<sub>2</sub> treatment) and HPF1 overexpression stimulate PARP1 WT and  $\Delta$ HD to produce ADPr that is detectable at a high Olaparib concentration. The experiments in **a** and **b** were repeated at least two times with similar results.

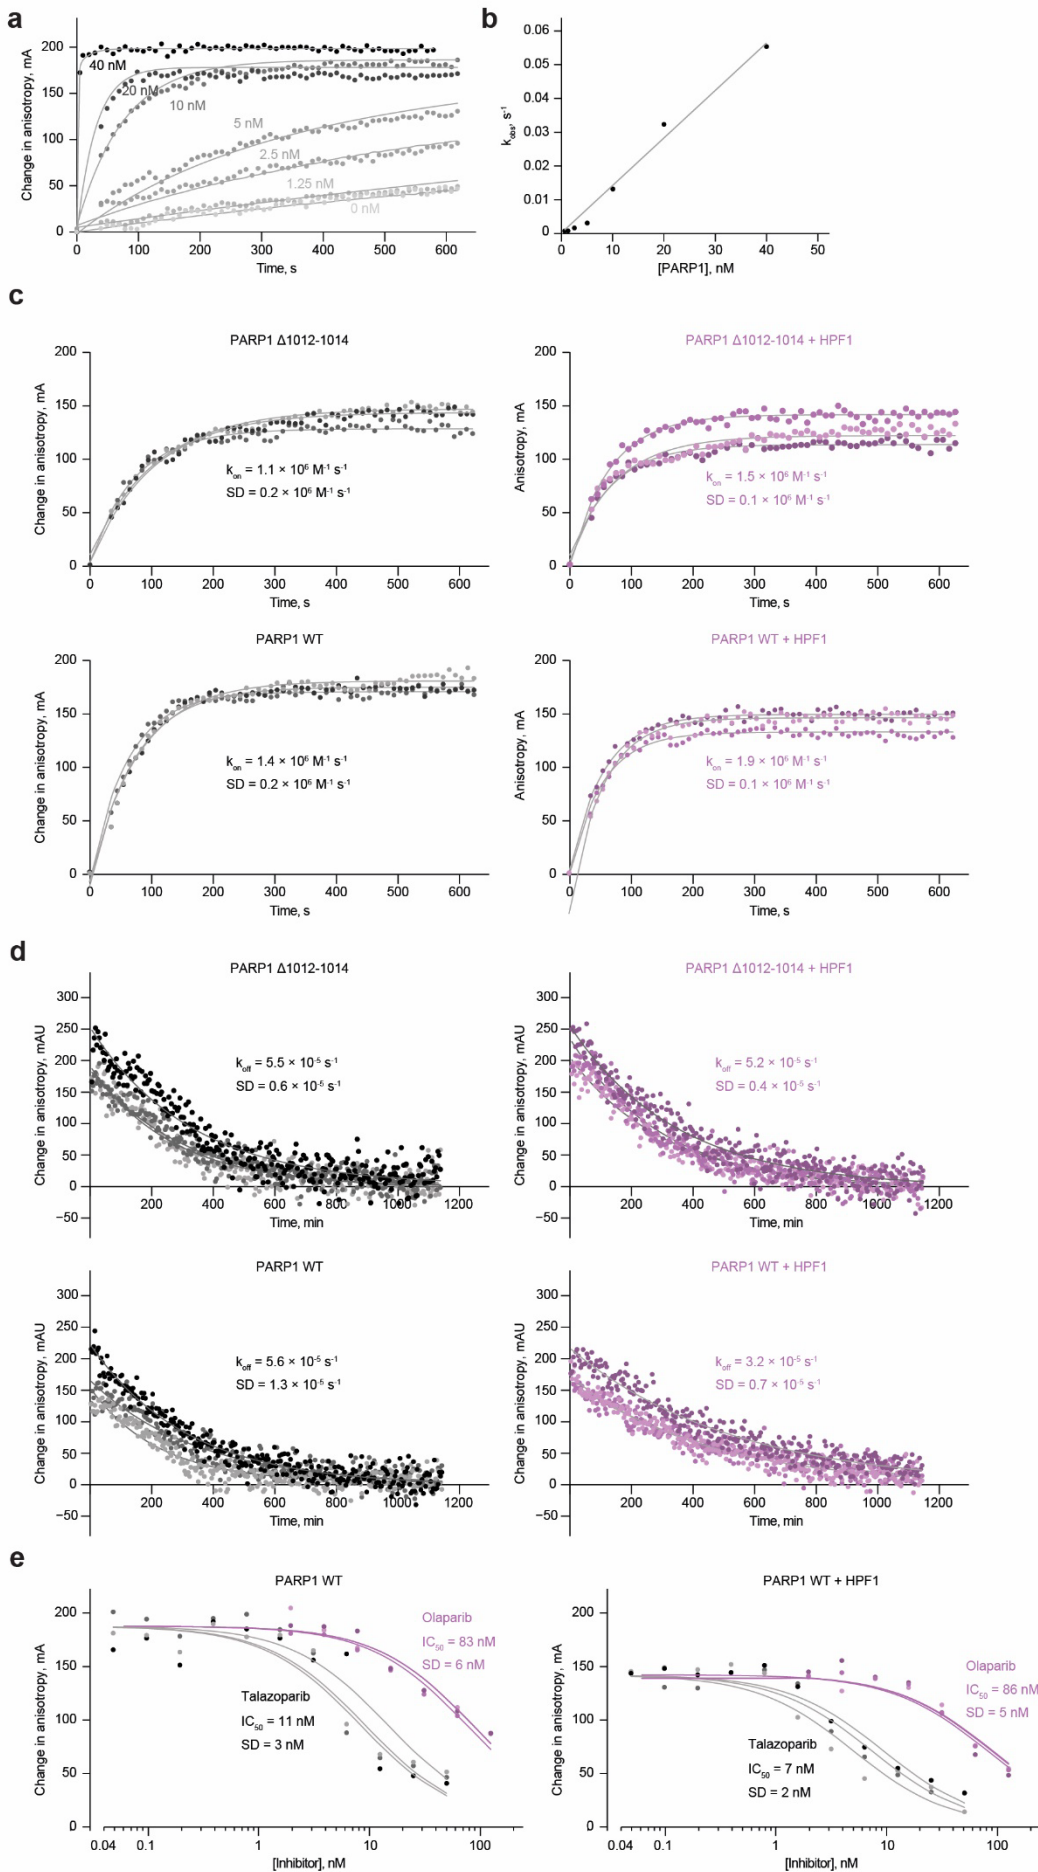

**Supplementary Figure 4: Binding of PARP inhibitors to PARP1 in the presence or absence of HPF1.**

**a-c**, Measuring association between the fluorescent Olaparib-derivative PARPi-FL and PARP1 using fluorescence anisotropy. Association of PARPi-FL with increasing molarities of PARP1 (**a**) was analysed, showing linear dependence of the apparent association rate constant  $k_{obs}$  on PARP1 concentration (**b**). PARP1 concentration of 10 nM was chosen for subsequent comparison of PARPi-FL binding to WT or HPF1 binding-deficient ( $\Delta$ 1012-1014) PARP1 in the presence or absence of HPF1 (**c**). **d**, Measuring dissociation of PARPi-FL from PARP1 (WT or  $\Delta$ 1012-1014) in the presence or absence of HPF1 after addition of a large excess of unlabelled Olaparib. **e**, Equilibrium competition assay in which PARPi-FL was outcompeted for PARP1 binding with increasing molarities of Talazoparib or Olaparib. The scale on the horizontal axis is logarithmic. For each of the experiments **c-e**, three repeats (different samples) were performed and fitted individually to estimate the association and dissociation rate constants ( $k_{on}$  and  $k_{off}$ ) or the half-maximal inhibitory concentration ( $IC_{50}$ ) as described in Methods. The mean and SD of these estimates are provided. More extensive data quantification and processing are shown in **Supplementary Tables 1 and 2**.

**Supplementary Table 1: PARPi-FL binding to WT or HPF1 binding-deficient ( $\Delta$ 1012-1014) PARP1 in the presence or absence of HPF1**

|                                 | $k_{\text{on}}$ ( $10^6 \text{ M}^{-1} \text{ s}^{-1}$ )* | $k_{\text{off}}$ ( $10^{-5} \text{ s}^{-1}$ )* | $K_D$ (pM)** |
|---------------------------------|-----------------------------------------------------------|------------------------------------------------|--------------|
| PARP1 WT                        | $1.4 \pm 0.2$                                             | $5.6 \pm 1.3$                                  | $39 \pm 10$  |
| PARP1 WT + HPF1                 | $1.9 \pm 0.1$                                             | $3.2 \pm 0.7$                                  | $17 \pm 3$   |
| PARP1 $\Delta$ 1012-1014        | $1.1 \pm 0.2$                                             | $5.5 \pm 0.6$                                  | $51 \pm 14$  |
| PARP1 $\Delta$ 1012-1014 + HPF1 | $1.5 \pm 0.1$                                             | $5.2 \pm 0.4$                                  | $36 \pm 6$   |

\* Data from each of three technical repeats (**Supplementary Fig. 4c** and **d**) were fitted as described in Methods. Mean  $\pm$  SD of the values obtained from the fitting are presented.

\*\* Calculated from  $k_{\text{on}}$  and  $k_{\text{off}}$  as described in Materials and methods.

**Supplementary Table 2: Olaparib and Talazoparib binding to PARP1 in the presence and absence of HPF1 estimated by outcompeting PARPi-FL**

|                      | IC <sub>50</sub> (nM)* | K <sub>i</sub> estimate (nM)** |
|----------------------|------------------------|--------------------------------|
| Talazoparib          | 11 ± 3                 | Not reliable                   |
| Talazoparib (+ HPF1) | 7 ± 2                  | Not reliable                   |
| Olaparib             | 83 ± 6                 | 0.54                           |
| Olaparib (+ HPF1)    | 86 ± 5                 | 0.25                           |

\* Refers to the amount of inhibitor needed to outcompete 1 nM PARPi-FL for binding to 6 nM PARP1. Data from each of three technical repeats (**Supplementary Fig. 4e**) were fitted as described in Methods. Mean ± SD of the values obtained from the fitting are presented.

\*\* Calculated as described in Methods from the mean IC<sub>50</sub> values and the K<sub>D</sub> values for PARPi-FL from **Supplementary Table 1**.

### Supplementary Table 3: Primer sequences

Primers used for site-directed mutagenesis of PARP1 constructs. To achieve mutations of multiple sites, the appropriate mutations were introduced sequentially.

| Mutation  | Forward primer                                                           | Reverse primer                                                                |
|-----------|--------------------------------------------------------------------------|-------------------------------------------------------------------------------|
| S499A     | PARP1_T1495G_SENSE:<br>CCAAGAGGGAAGGCAGGGGCTGCGC                         | PARP1_T1495G_ANTISENSE:<br>GCGCAGCCCCTGCCTTCCCTCTTGG                          |
| S507A     | PARP1_A1519G_G1520C_SENSE:<br>GGCTGCGCTCTCCAAAAAGCCAAGGGCC<br>AGG        | PARP1_A1519G_G1520C_ANTISENSE:<br>CCTGGCCCTTGGCTTTTTTGGAGAGCGCAG<br>CC        |
| S519A     | PARP1_T1555G_SENSE:<br>GTTAATTCATTCTCTTTTCAGCTTTGTTG<br>ATACCTTCCTCCTTGA | PARP1_T1555G_ANTISENSE:<br>TCAAGGAGGAAGGTATCAACAAAGCTGAA<br>AAGAGAATGAAATTAAC |
| Y634A     | 357_PARP1_Y634A_FOR:<br>AGGGGGTAGAACTTTTTGGGAGCCTTCGT<br>GAAATTTTTGGAGTG | 358_PARP1_Y634A_REV:<br>CACTCCAAAAATTTACGAAGGCTCCCAA<br>AAGTTCTACCCCT         |
| E471A     | PARP1_A1412C_SENSE:<br>GTGCGCTAAGAACAACGCCTGAAGGCTCT<br>TGGT             | PARP1_A1412C_ANTISENSE:<br>ACCAAGAGCCTTCAGGCGTTGTTCTTAGCG<br>CAC              |
| E484A     | PARP1_A1451C_SENSE:<br>CTCTGCCTTCACCGCTGCCCCCAAGG                        | PARP1_A1451C_ANTISENSE:<br>CCTTGGGGGCAGCGGTGAAGGCAGAG                         |
| A488/491A | PARP1_A1463C_A1472C_SENSE:<br>GGGGCCACAACGCAACAGGCGCTGCCTT<br>CACCT      | PARP1_A1463C_A1472C_ANTISENSE:<br>AGGTGAAGGCAGCGCCTGTTGCAGTTGTGG<br>CCCC      |
| E513/514A | PARP1_A1538C_A1541C_SENSE:<br>CAGATTTGTTGATACCTGCCGCTTGACCT<br>GGCCCTTG  | PARP1_A1538C_A1541C_ANTISENSE:<br>CAAGGGCCAGGTCAAGGCGGCAGGTATCA<br>ACAAATCTG  |

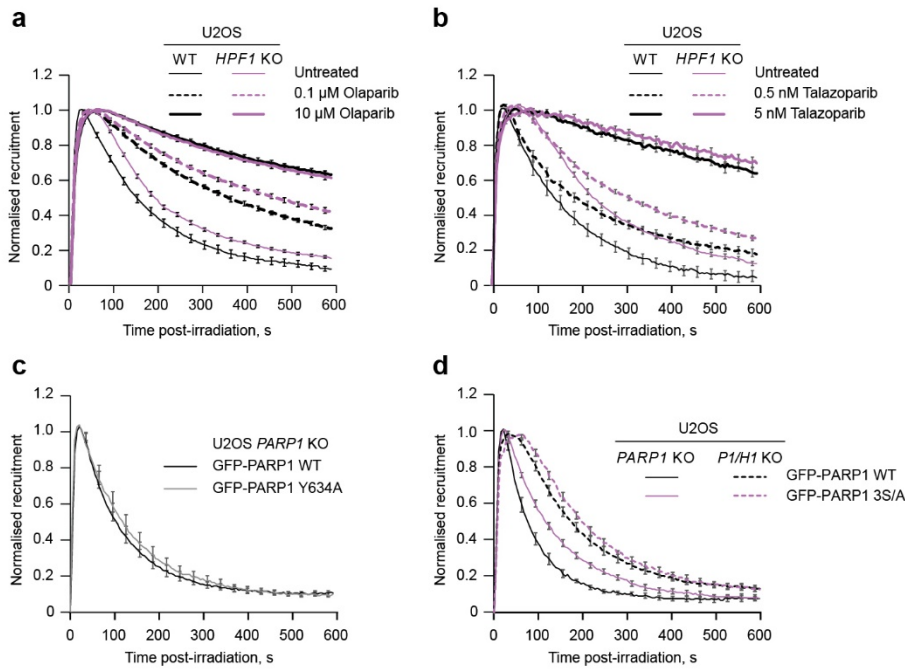

**Supplementary Figure 5: PARP1 recruitment to sites of laser microirradiation depends on HPF1, PARP1 activity and PARP1 auto-modification on serine but not tyrosine sites (related to Fig. 3).**

**a-b**, Quantification of GFP-PARP1 chromobody at sites of laser microirradiation in WT and HPF1 KO cells in the presence of indicated molarities of Olaparib (**a**) or Talazoparib (**b**). **c**, Quantification of GFP-PARP1 WT or PARP1 Y634A at damaged sites in PARP1 KO cells. **d**, Quantification of GFP-PARP1 WT or 3S/A at damaged sites in PARP1 KO or PARP1/HPF1 KO (P1/H1 KO) cells. For **a-d**, individual curves representing PARP1 recruitment kinetics at damage sites were normalized to maximum recruitment. All data are shown as mean  $\pm$  SEM from the analysis of at least 10 nuclei.



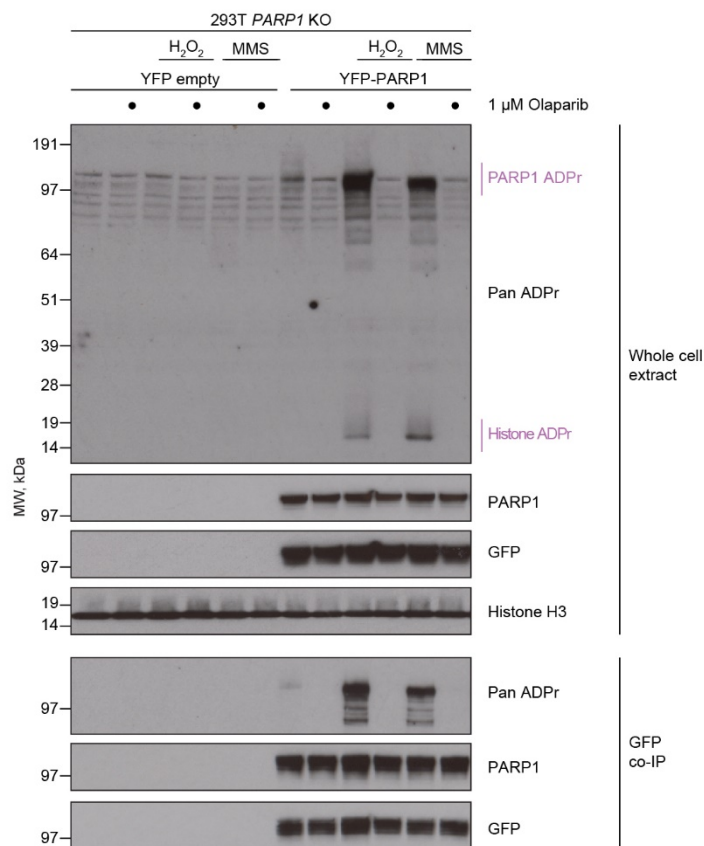

**Supplementary Figure 6: DNA damaging agents H<sub>2</sub>O<sub>2</sub> and MMS trigger similar patterns of cellular ADPr (related to Fig. 3).**

Immunoblots of whole cell extract and GFP coimmunoprecipitation (GFP co-IP) samples are shown. ADPr is localised primarily to PARP1 and histones. The experiment was repeated independently three times with similar results.

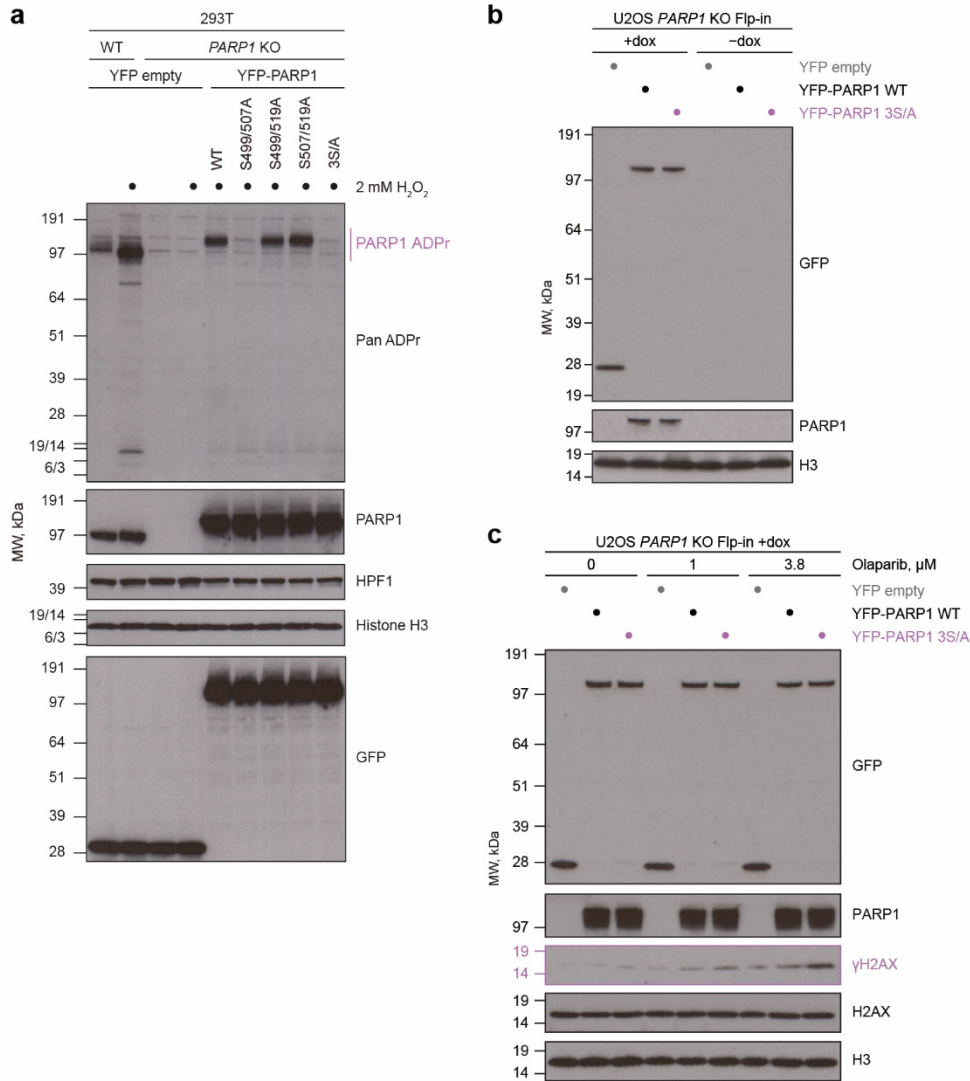

**Supplementary Figure 7: S499, S507 and, to a lesser extent, S519 are the major sites of PARP1 auto-modification, which loss leads to increased  $\gamma$ H2AX formation upon Olaparib treatment (related to Fig. 3).**

**a**, Comparison of the effect of PARP1 S499/507/519A (3S/A), S499/507A, S499/519A and S507/519A mutations on DNA damage (H<sub>2</sub>O<sub>2</sub>)-induced ADPr levels. **b**, Control immunoblots comparing expression of GFP-PARP1 WT and 3S/A to accompany **Fig. 3i**. **c**, Loss of key serine auto-modification sites in PARP1 3S/A mutant leads to increased  $\gamma$ H2AX formation following 6-day Olaparib treatment. The experiments in **a-c** were repeated independently two times with similar results.
