# Supplementary material for: Serine-linked PARP1 auto-modification controls PARP inhibitor response
Source: PubMed Central journal article supplement (PMC8249464; doi:10.1038/s41467-021-24361-9), 2021-07-01
Supplement: 41467_2021_24361_MOESM2_ESM.pdf [file 41467_2021_24361_MOESM2_ESM.pdf]

## Reporting Summary

Nature Research wishes to improve the reproducibility of the work that we publish. This form provides structure for consistency and transparency in reporting. For further information on Nature Research policies, see our [Editorial Policies](#) and the [Editorial Policy Checklist](#).

### Statistics

For all statistical analyses, confirm that the following items are present in the figure legend, table legend, main text, or Methods section.

n/a Confirmed

- The exact sample size ( $n$ ) for each experimental group/condition, given as a discrete number and unit of measurement
- A statement on whether measurements were taken from distinct samples or whether the same sample was measured repeatedly
- The statistical test(s) used AND whether they are one- or two-sided  
*Only common tests should be described solely by name; describe more complex techniques in the Methods section.*
- A description of all covariates tested
- A description of any assumptions or corrections, such as tests of normality and adjustment for multiple comparisons
- A full description of the statistical parameters including central tendency (e.g. means) or other basic estimates (e.g. regression coefficient) AND variation (e.g. standard deviation) or associated estimates of uncertainty (e.g. confidence intervals)
- For null hypothesis testing, the test statistic (e.g.  $F$ ,  $t$ ,  $r$ ) with confidence intervals, effect sizes, degrees of freedom and  $P$  value noted  
*Give  $P$  values as exact values whenever suitable.*
- For Bayesian analysis, information on the choice of priors and Markov chain Monte Carlo settings
- For hierarchical and complex designs, identification of the appropriate level for tests and full reporting of outcomes
- Estimates of effect sizes (e.g. Cohen's  $d$ , Pearson's  $r$ ), indicating how they were calculated

*Our web collection on [statistics for biologists](#) contains articles on many of the points above.*

### Software and code

Policy information about [availability of computer code](#)

**Data collection** Flow cytometry data were collected using CytExpert Acquisition and Analysis Software Version 2.3 (Beckman Coulter). Data collection for fluorescence polarisation/anisotropy assays was performed using SoftMax Pro version 5.01 and PHERAstar software version 4.00 R3.

**Data analysis** Flow Cytometry data were analysed using FlowJo v10 (BD Biosciences). Live-cell imaging data were analysed using Matlab (MathWorks). Image analysis for the colony formation assay was done using ImageJ. Data visualization and statistical analysis was done using GraphPad PRISM 7, Microsoft Excel 2016 (including Solver). Images were assembled in Adobe Illustrator 25.1.

For manuscripts utilizing custom algorithms or software that are central to the research but not yet described in published literature, software must be made available to editors and reviewers. We strongly encourage code deposition in a community repository (e.g. GitHub). See the Nature Research [guidelines for submitting code & software](#) for further information.

### Data

Policy information about [availability of data](#)

All manuscripts must include a [data availability statement](#). This statement should provide the following information, where applicable:

- Accession codes, unique identifiers, or web links for publicly available datasets
- A list of figures that have associated raw data
- A description of any restrictions on data availability

All raw data are included in the manuscript or can be provided upon request.

## Field-specific reporting

Please select the one below that is the best fit for your research. If you are not sure, read the appropriate sections before making your selection.

Life sciences  Behavioural & social sciences  Ecological, evolutionary & environmental sciences

For a reference copy of the document with all sections, see [nature.com/documents/nr-reporting-summary-flat.pdf](https://www.nature.com/documents/nr-reporting-summary-flat.pdf)

## Life sciences study design

All studies must disclose on these points even when the disclosure is negative.

|                 |                                                                                                                                                                                                                                                                       |
|-----------------|-----------------------------------------------------------------------------------------------------------------------------------------------------------------------------------------------------------------------------------------------------------------------|
| Sample size     | No statistical method was used to determine sample size as no inference from small sample to larger populations was done. Two or three independent repeats were performed for each experiment to confirm reproducibility according to the best practice in the field. |
| Data exclusions | No data were excluded.                                                                                                                                                                                                                                                |
| Replication     | All experiments were repeated at least two to three times independently with similar results. All observations were found to be reproducible.                                                                                                                         |
| Randomization   | Randomisation was not required due to the mechanistic character of the study with objective readouts and lack of animal-based experiments.                                                                                                                            |
| Blinding        | No blinding was performed as the bias from prior knowledge of samples in case of biochemical, blotting, survival, and imaging experiments described in the study is considered limited. All samples including controls were analysed in exactly the same manner.      |

## Reporting for specific materials, systems and methods

We require information from authors about some types of materials, experimental systems and methods used in many studies. Here, indicate whether each material, system or method listed is relevant to your study. If you are not sure if a list item applies to your research, read the appropriate section before selecting a response.

### Materials & experimental systems

| n/a                                 | Involved in the study                                     |
|-------------------------------------|-----------------------------------------------------------|
| <input type="checkbox"/>            | <input checked="" type="checkbox"/> Antibodies            |
| <input type="checkbox"/>            | <input checked="" type="checkbox"/> Eukaryotic cell lines |
| <input checked="" type="checkbox"/> | <input type="checkbox"/> Palaeontology and archaeology    |
| <input checked="" type="checkbox"/> | <input type="checkbox"/> Animals and other organisms      |
| <input checked="" type="checkbox"/> | <input type="checkbox"/> Human research participants      |
| <input checked="" type="checkbox"/> | <input type="checkbox"/> Clinical data                    |
| <input checked="" type="checkbox"/> | <input type="checkbox"/> Dual use research of concern     |

### Methods

| n/a                                 | Involved in the study                              |
|-------------------------------------|----------------------------------------------------|
| <input checked="" type="checkbox"/> | <input type="checkbox"/> ChIP-seq                  |
| <input type="checkbox"/>            | <input checked="" type="checkbox"/> Flow cytometry |
| <input checked="" type="checkbox"/> | <input type="checkbox"/> MRI-based neuroimaging    |

## Antibodies

### Antibodies used

The following primary antibodies were used for immunoblotting: commercial mouse anti-BRCA1 (EMD Millipore, OP92, 1:1,000), mouse anti-BRCA2 (EMD Millipore, OP95, 1:500), rabbit anti-tubulin (Abcam, ab6046, 1:10,000), rabbit pan-ADPr binding reagent (EMD Millipore, MABE1016, 1:1,500), rabbit anti-ARH3 (Atlas Antibodies, HPA027104, 1:1,000), rabbit anti-γH2AX (Abcam, ab2893, 1:2,000), rabbit anti-H2AX (Cell Signaling, 7631S, 1:1,000), rabbit anti-H3 (EMD Millipore, 07-690, 1:50,000), rabbit anti-PARP1 (Abcam, ab32138, 1:5,000), rabbit anti-H3S10P (Abcam, ab5176, 1:2,000), rabbit anti-mono/poly ADPr (Cell Signaling, 83732, 1:1,000), rabbit anti-GFP (Abcam, ab290, 1:5,000), mouse anti-Flag (Sigma Aldrich, A8592-1MG, 1:50,000); custom-made rabbit anti-HPF1 (Gibbs-Seymour et al., 2016, 1:1,000), rabbit anti-HPF1 (DC Biosciences, against peptide RELPETDADLKRIC, 1:250).

The following secondary antibodies were used for immunoblotting: goat anti-mouse (Agilent, P0447, 1:2,000), swine anti-rabbit (Agilent, P0399, 1:2,000). Rabbit anti-γH2AX primary antibody (Cell Signaling, 9718S, 1:200) and Alexa Fluor 488-conjugated goat anti-rabbit secondary antibody (Molecular Probes/Thermo Fisher, A11034, 1:500) were used for flow cytometry.

### Validation

All commercial antibodies were validated by manufacturers for the use at least in immunoblotting and immunoprecipitation. The commercial anti-HPF1 anti-body was validated by the Human Proteome Atlas project in multiple tissues and cell lines (data at <https://www.proteinatlas.org/ENSG00000056050-HPF1>) and additionally by us using immunoblotting with 293T WT and HPF1 KO cells (Suskiewicz et al., Nature, 2020). The anti-ARH3 antibody was validated by the manufacturer using both immunoblotting and immunocytochemistry (images at <https://www.atlasantibodies.com/products/antibodies/primary-antibodies/triple-a-polyclonals/adprhl2-antibody-hpa027104/>) and additionally by us using immunoblotting in 293T and U2OS WT and ARH3 KO cell lines (see Palazzo et al., eLife, 2018). The custom-made anti-HPF1 antibody was validated by us with immunoblotting using purified human HPF1 and 293T and U2OS WT and HPF1 KO cells (Gibbs-Seymour et al., Mol Cell, 2016 and Palazzo et al., eLife, 2018), as well as testis, ovary, brain, heart, kidney and liver tissue from WT and HPF1 KO mice (unpublished). Anti γ-H2AX antibody was validated by the manufacturer for the use in immunocytochemistry and immunoblotting (see data at <https://www.abcam.com/gamma->

h2axphospho-s139-antibody-ab2893.html) and additionally by us for the use in flow cytometry by comparing untreated cells and cells treated with genotoxic drugs. Anti pan-ADPr binding reagent (MABE1016) was extensively validated with dot blot, immunoblotting, and immunofluorescence by the Krauss group as described in Gibson et al., Biochemistry, 2017.

## Eukaryotic cell lines

### Policy information about [cell lines](#)

|                                                                   |                                                                                                                                                                                                                                                        |
|-------------------------------------------------------------------|--------------------------------------------------------------------------------------------------------------------------------------------------------------------------------------------------------------------------------------------------------|
| Cell line source(s)                                               | 293T (CRL-3216) and U2OS (HTB-96) cells were obtained from ATCC. U2OS Flp-In T-Rex cells were a gift from Fumiko Esashi (University of Oxford), but they come from Daniel Durocher's lab who described their generation in Stewart et al., Cell, 2009. |
| Authentication                                                    | Cells were not authenticated in our lab. 293T and U2OS cell lines were authenticated with morphology, karyotyping, and PCR based approaches by ATCC.                                                                                                   |
| Mycoplasma contamination                                          | The cell lines were tested for mycoplasma contamination and confirmed as mycoplasma negative.                                                                                                                                                          |
| Commonly misidentified lines (See <a href="#">ICLAC</a> register) | No commonly misidentified lines were used.                                                                                                                                                                                                             |

## Flow Cytometry

### Plots

Confirm that:

- The axis labels state the marker and fluorochrome used (e.g. CD4-FITC).
- The axis scales are clearly visible. Include numbers along axes only for bottom left plot of group (a 'group' is an analysis of identical markers).
- All plots are contour plots with outliers or pseudocolor plots.
- A numerical value for number of cells or percentage (with statistics) is provided.

### Methodology

|                           |                                                                                                                                                                                                                                                                                                                                                                                                                                                                                                                                                                                                                                                                                                                                                                                                                                                                                                                                            |
|---------------------------|--------------------------------------------------------------------------------------------------------------------------------------------------------------------------------------------------------------------------------------------------------------------------------------------------------------------------------------------------------------------------------------------------------------------------------------------------------------------------------------------------------------------------------------------------------------------------------------------------------------------------------------------------------------------------------------------------------------------------------------------------------------------------------------------------------------------------------------------------------------------------------------------------------------------------------------------|
| Sample preparation        | For cell cycle analysis, human U2OS osteosarcoma (ATCC HTB-96) cells were seeded in 6-well plates, treated and incubated with 10 $\mu$ M EdU for 1 hour at the end of treatment. Cells were harvested by trypsinization and labelled using the Click-iT Plus EdU Alexa Fluor 647 Flow Cytometry Assay Kit (Invitrogen) according to the manufacturer's instructions. For the analysis of DSB levels, cells were then stained protected from light with $\gamma$ H2AX primary antibody (Cell Signaling, 9718S, 1:200) in 1% BSA in PBS for 1 hour at room temperature, washed once and incubated for 30 minutes with Alexa Fluor 488-conjugated goat anti-rabbit secondary antibody (Molecular Probes/Thermo Fisher, A11034, 1:500) in 1% BSA in PBS. For DAPI staining, cell pellets were resuspended in 1 $\mu$ g/mL DAPI solution in PBS and incubated for 10 minutes. Cells were washed in PBS and analysed immediately after staining. |
| Instrument                | Cytoflex LX (Beckman Coulter).                                                                                                                                                                                                                                                                                                                                                                                                                                                                                                                                                                                                                                                                                                                                                                                                                                                                                                             |
| Software                  | Data were collected using CytExpert Acquisition and Analysis Software Version 2.3 (Beckman Coulter) and analysed using FlowJo v10 (BD Biosciences).                                                                                                                                                                                                                                                                                                                                                                                                                                                                                                                                                                                                                                                                                                                                                                                        |
| Cell population abundance | Cells were not sorted in this study.                                                                                                                                                                                                                                                                                                                                                                                                                                                                                                                                                                                                                                                                                                                                                                                                                                                                                                       |
| Gating strategy           | Cells were first selected by excluding events with low forward (FSC) and side scatter (SSC) signals. Doublets or aggregates were excluded after plotting FSC or SSC Area versus Height or Width. Cell cycle analysis was performed on the single cell population after plotting EdU intensity (Alexa Fluor 647) against DAPI signal. $\gamma$ H2AX-positive and -negative single cells were discriminated based on the increase in $\gamma$ H2AX signal in Olaparib-treated samples as compared to untreated cells after plotting $\gamma$ H2AX intensity (Alexa Fluor 488) against DAPI.                                                                                                                                                                                                                                                                                                                                                  |

Tick this box to confirm that a figure exemplifying the gating strategy is provided in the Supplementary Information.
